# Supplementary material for: Enhancing exciton binding energy and photoluminescence of formamidinium lead bromide by reducing its dimensions to 2D nanoplates for producing efficient light emitting diodes
Source: Royal Society of Chemistry journal article supplement (doi:10.1039/c8nr04986f), 2018-01-01
Supplement: c8nr04986f1.pdf [file c8nr04986f1.pdf]

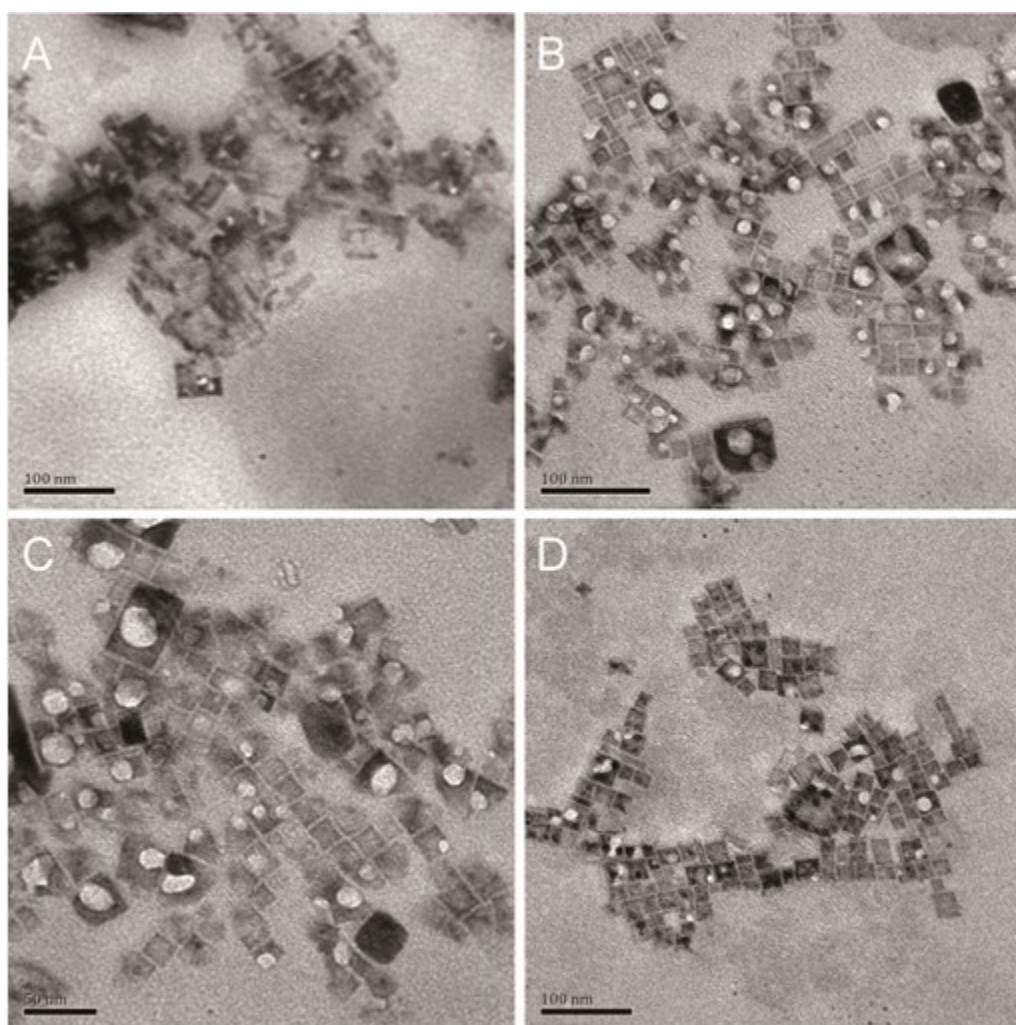

**Figure S1.** TEM images of FAPbBr<sub>3</sub> nanoplates when different solvents were used (A is DMF; B is ethyl alcohol; C is isopropanol and D is isobutanol.)
